1 **Population histories of the United States revealed through fine-scale migration and**  
2 **haplotype analysis**

3

4 Chengzhen L. Dai<sup>1</sup>, Mohammad M. Vazifeh<sup>2</sup>, Chen-Hsiang Yeang<sup>3</sup>, Remi Tachet<sup>2</sup>, R. Spencer  
5 Wells<sup>4</sup>, Miguel G. Vilar<sup>5</sup>, Mark J. Daly<sup>6,7,8,9</sup>, Carlo Ratti<sup>2\*</sup>, Alicia R. Martin<sup>7,8,9\*†</sup>

6

7 <sup>1</sup> Department of Electrical Engineering and Computer Science, Massachusetts Institute of  
8 Technology, Cambridge, MA 02139, USA

9 <sup>2</sup> Senseable City Lab, Massachusetts Institute of Technology, Cambridge, MA 02139, USA

10 <sup>3</sup> Institute of Statistical Science, Academia Sinica, Nankang, Taipei, Taiwan

11 <sup>4</sup> Insitome, Inc, Austin, TX 78701, USA

12 <sup>5</sup> Genographic Project, National Geographic Society, Washington, DC 20036, USA

13 <sup>6</sup> Institute for Molecular Medicine Finland (FIMM), University of Helsinki, Helsinki, Finland

14 <sup>7</sup> Analytic and Translational Genetics Unit, Massachusetts General Hospital, Boston, MA 02114,  
15 USA

16 <sup>8</sup> Program in Medical and Population Genetics, Broad Institute of MIT and Harvard, Cambridge,  
17 MA 02142, USA

18 <sup>9</sup> Stanley Center for Psychiatric Research, Broad Institute of MIT and Harvard, Cambridge, MA  
19 02142, USA

20

21 \*These authors jointly supervised this work

22 †Corresponding author: [armartin@broadinstitute.org](mailto:armartin@broadinstitute.org)

23 **Abstract**

24

25 The population of the United States is shaped by centuries of migration, isolation, growth, and  
26 admixture between ancestors of global origins. Here, we assemble a comprehensive view of  
27 recent population history by studying the ancestry and population structure of over 32,000  
28 individuals in the US using genetic, ancestral birth origin, and geographic data from the National  
29 Geographic Genographic Project. We identify migration routes and barriers that reflect historical  
30 demographic events. We also uncover the spatial patterns of relatedness in subpopulations  
31 through the combination of haplotype clustering, ancestral birth origin analysis, and local  
32 ancestry inference. These patterns include substantial substructure and heterogeneity in  
33 Hispanics/Latinos, isolation-by-distance in African Americans, elevated levels of relatedness  
34 and homozygosity in Asian immigrants, and fine-scale structure in European descents. Taken  
35 together, our results provide detailed insights into the genetic structure and demographic history  
36 of the diverse US population.

37

38 **Keywords:** population genetics, human history, human genomics, USA

39 **Main Text:** 3,765 words (excluding Methods, References, and Figures), 6 figures, 1 table

## 40 Introduction

41  
42 The United States population is a diverse collection of global ancestries shaped by migration  
43 from distant continents and admixture of migrants and Native Americans. Throughout the past  
44 few centuries, continuous migration and gene flow have played major roles in shaping the  
45 diversity of the US. Mixing between groups that have historically been genetically and spatially  
46 distinct have resulted in individuals with complex ancestries while within-country migration have  
47 led to genetic differentiation.<sup>1-6</sup>

48  
49 Previous genetics studies of the US population have sought to disentangle the relationship  
50 between the genetic ancestry and population history of African Americans, European  
51 Americans, and Hispanics/Latinos. In African Americans, proportions of African, European, and  
52 Native American ancestry vary across the country and reflect migration routes, slavery, and  
53 patterns of segregation between states.<sup>2,3,7</sup> European American ancestry is characterized by  
54 both mixing between different European populations as well as admixture with non-European  
55 populations.<sup>6,8,9</sup> Isolation and expansions in certain European population have also resulted in  
56 founder effects.<sup>10,11</sup> The mixing of European settlers with Native Americans have contributed to  
57 large variations in the admixture proportions of different Hispanic/Latino populations.<sup>1,4,5</sup> Among  
58 Hispanics/Latinos, Mexicans and Central Americans carry more Native American ancestry;  
59 Puerto Ricans and Dominicans have higher African ancestry; and Cubans have strong  
60 European ancestry.<sup>1,4</sup> Although much effort has been made to understand the genetic diversity  
61 in the US, fine-scale patterns of demography, migration, isolation, and founder effects are still  
62 being uncovered with the growing scale of genetic data, particularly for Latin American and  
63 African descendants with complex admixture history.<sup>12,13</sup> At the same time, there has been little  
64 research on the population structure of individuals with East Asian, South Asian, and Middle  
65 Eastern ancestry in the US.

66  
67 In addition to being of anthropological interest, understanding fine-scale human history and its  
68 role in shaping genetic variation is also important for interpreting the genetic basis of biomedical  
69 traits. Currently, these roles are best understood in European populations due to Eurocentric  
70 biases in studies.<sup>14,15</sup> Consequently, translational interpretability gaps are evident in non-  
71 European populations: more variants of unknown significance are identified via genetic testing;<sup>16</sup>  
72 polygenic risk scores for complex disease risks are much less accurate;<sup>15,17</sup> and false positive  
73 genetic misdiagnoses are more common.<sup>18</sup> Thus, studies of diverse, heterogeneous populations

74 offer substantial value to both our understanding of population history and biomedical  
75 outcomes.<sup>19</sup>

76  
77 In this study, we comprehensively explore the population structure and migration history of over  
78 32,000 genotyped individuals in the US who partook in the National Geographic Genographic  
79 Project, a not-for-profit public participation research initiative to study human migration history.<sup>20</sup>  
80 Here, we identify patterns of genetic ancestry and haplotype sharing among the project  
81 participants. We combine these patterns with ancestral birth origin records and geographic  
82 information to uncover recent demographic and migration trends. Taken together, we provide  
83 insights into the ancestral origins and complex population histories in the US.

84

85

## 86 **Results**

87

### 88 **Genetic ancestry and diversity across the United States**

89 To assess the diversity of ancestries among individuals in the Genographic Project, we first  
90 performed PCA and ADMIXTURE analysis (**Figure 1A-C; Figure S1-S2**).<sup>21,22</sup> Since self-  
91 reported ancestry does not always reflect genetic ancestry, we objectively assigned continental  
92 ancestry to each Genographic sample using the 1000 Genomes Project data as reference  
93 populations (**Methods and Materials**). We first trained a Random Forest classifier on the first  
94 10 principal components (PCs) of the 1000 Genome Project samples with super population  
95 classifications as ancestry labels (EUR = European, AMR = Admixed American, AFR = African,  
96 EAS = East Asian, SAS = South Asian). We then used the trained model to assigned continent  
97 ancestry to each individual in the Genographic cohort at 90% confidence. A total of 3,028  
98 individuals (9.3% of total) did not meet the classification threshold, although many have  
99 ancestry patterns similar to other European individuals (**Figure 1C; Table S1**). The inability to  
100 classify these individuals may be due to the complex and variable admixture profiles of certain  
101 populations such as Hispanics/Latinos.

102

103 Regional differences in genetic ancestry proportions correspond to historical demographic  
104 trends. We evaluated the admixture proportions of classified individuals across the four  
105 designated US Census regions: South, Northeast, Midwest, and West (**Figure 1C; Figure S2**).  
106 Individuals of European descent make up the majority (78.5%) of the Genographic cohort and  
107 are the most prevalent in the Midwest (82.8% of individuals in the Midwest;  $P < 0.01$ , Fisher's

108 exact test; **Table S1**). Individuals classified as having African ancestry are most common in the  
109 South (3.2%), followed by the Northeast (3.0%). Individuals of Native American ancestry are  
110 most prominent in the West and South (9.7% and 7.8% of total individuals in the West and  
111 South, respectively;  $P < 0.05$ , Fisher's exact test). East Asians mostly reside in the West (2.1%),  
112 while South Asians are most abundant in the Northeast (1.0%).

113

114 To uncover population substructure, we performed dimensionality reduction with Uniform  
115 Manifold Approximation and Projection (UMAP) on the first 20 PCs of a combined Genographic  
116 and 1000 Genomes Project dataset.<sup>23,24</sup> By leveraging multiple PCs at once, UMAP can  
117 disentangle subcontinental structure (**Figure 1D-E; Figure S3-S4**). Similar to previous  
118 analysis,<sup>24</sup> populations in the 1000 Genomes Project form distinct clusters corresponding to  
119 ancestry and geography. The Genographic individuals project into several clusters, overlapping  
120 with the 1000 Genomes Project clusters. Consistent with the PCA and ADMIXTURE analysis,  
121 the largest clusters correspond to European ancestry and cluster closely with the 1000  
122 Genomes CEU and GBR populations (CEU=Utah Residents with Northern and Western  
123 European Ancestry, GBR=British in England and Scotland).

124

125 While UMAP is a visualization tool with no direct interpretation on genetic distance, the  
126 continuum of points connecting UMAP clusters reflects the varying degrees of estimated  
127 admixture between different continental ancestries. In particular, the complex population  
128 structure of Hispanics/Latinos is shown by the points spanning between the clusters of  
129 European, Native American, and African ancestry. Coloring of these points based on ancestry  
130 proportions affirms the relationship between the degree of admixture and their relative position  
131 between reference clusters. Interestingly, African American individuals from both datasets form  
132 a single continuum from the European cluster to the Yoruba (YRI) and Esan (ESN) populations  
133 of Nigeria in the 1000 Genomes Project, indicative of the West African origins of most African  
134 Americans. This observation is consistent with and further expands the previous finding that the  
135 African tracts in the admixed 1000 Genomes populations of ACB and ASW were previously  
136 found to be similar to the Nigerian YRI and ESN populations.<sup>2,17</sup>

137

### 138 **Population differentiation and migration rate inference across the United States**

139 To better understand the relationship between genetics and geography, we investigated  
140 migration rates for genetically inferred Europeans, African Americans, and Hispanic/Latinos  
141 across the United States. We excluded East Asians and South Asians due to small sample size

142 and limited our analysis to the contiguous 48 states. We inferred effective migration rates with  
143 the estimating effective migration surfaces (EEMS) method,<sup>25</sup> which statistically characterizes  
144 genetic differentiation via resistance distance across non-homogenous landscapes. By  
145 overlaying a dense regular grid of demes and measuring genetic dissimilarities between  
146 neighboring demes, EEMS quantifies and visualizes areas with high relative rates of effective  
147 migration (colored in blue) and areas with low relative rates of effective migration (also called  
148 migration barriers and colored in dark orange).

149

150 The inferred migration rates for African Americans reveal genetic signatures of historical  
151 demographic events (**Figure 2A; Figure S5**). Along the Atlantic coast from the Florida  
152 Panhandle to southern Maine, we find high effective migration rates, indicating the constant  
153 migration and similar effective population sizes of African Americans in these states. However,  
154 we also observe a strong north-south barrier to migration starting along the Appalachian  
155 Mountain Range, continuing north up the Mississippi River, and extending west across the rest  
156 of the country. This migration barrier, along with the migration barrier spanning Texas and New  
157 Mexico, reveals a pattern of isolation-by-distance that is consistent with the Great Migration  
158 from the 1910s to the 1960s in which an estimated 6 million African Americans migrated out of  
159 the South to cities across the Northeast, Midwest and West.<sup>7,26</sup>

160

161 A highly complex pattern of migration exists amongst Hispanics/Latinos with varying migration  
162 rates across the country, capturing regional patterns of genetic similarity. Hispanics/Latinos in  
163 the southwestern states including two regions bordering Mexico--one in California and another  
164 extending from New Mexico to Texas--exhibit high effective migration rates and are separated  
165 by a migration barrier in Arizona (**Figure 2B; Figure S5**). These two distinct regions likely reflect  
166 known differences in northward migration from east versus west Mexico.<sup>8,27</sup> Along the Atlantic  
167 coast from Florida to New York, effective migration has also been fluid. However, barriers to  
168 migration are observed west of the Atlantic coast to the Mississippi River, likely resulting from  
169 varying admixture proportions.

170

171 The patterns of migration for Europeans capture subcontinental structure. Elevated migration  
172 rates are observed across most of the country, except for many states in the Midwest and along  
173 the Atlantic coast. We find low effective migration rates surrounding Minnesota and North  
174 Dakota, potentially due to the genetic dissimilarity of Finnish and Scandinavian ancestry  
175 abundant in the region (**Figure 2C; Figure S5**).<sup>8</sup> We also find reduced migration rates across

176 Ohio, West Virginia, and Virginia, suggesting the existence of genetic differentiation along the  
177 Appalachian Mountains. Many of the major cities, such as Chicago, Philadelphia, and Miami,  
178 are also barriers to migration, perhaps due to higher admixture proportions within cities. The  
179 migration barrier encompassing metropolitan New York City may be explained in part by the  
180 presence of divergent European populations, such as Ashkenazi Jews (**Figure 2C**).

181

### 182 **Coupling fine-scale haplotype clusters and multigenerational birth records uncovers** 183 **distinct subcontinental structure**

184 To disentangle more recent and subtle population structure, we performed identity-by-descent  
185 (IBD) clustering on the Genographic cohort and annotated clusters using multigenerational self-  
186 reported birth origin data. We first built an IBD network from pairwise IBD sharing among 31,783  
187 unrelated individuals. In this network, vertices represent individuals and edges represent the  
188 cumulative IBD (in centimorgans, cM) between pairs of individuals. We employed the Louvain  
189 method, a greedy heuristic algorithm, to recursively partition vertices in the graph into clusters  
190 that maximize modularity at each level of hierarchy.<sup>8,28</sup> The clusters of individuals resulting from  
191 each iteration can be interpreted as having greater amounts of cumulative IBD shared between  
192 individuals within the cluster than with those outside of the cluster. To aid in the interpretation of  
193 the clusters, we merged clusters with low genetic differentiation ( $F_{ST} < 0.0001$ ) at the lowest  
194 level of hierarchy, resulting in a final set of 25 clusters (**Table 1**). We annotated each cluster  
195 based on ancestral birth origin and ethnicity data and constructed a neighbor-joining tree based  
196 on the  $F_{ST}$  values (**Figure 3**). 98% of the 3,028 individuals that were not classified by our  
197 Random Forest model were assigned to a haplotype cluster. No single cluster was  
198 overrepresented by unclassified individuals, as unclassified individuals comprised of 8-11% of  
199 each cluster.

200

201 Genetic and geographic diversity is greatest amongst Hispanic/Latino haplotype clusters. We  
202 identified a total of five Hispanic-related clusters. The largest of these cluster (n=810) is strongly  
203 associated with south Florida (OR = 10.4;  $p = 2.5e-25$ ; **Figure 4, Table S4**) but is also found in  
204 California, and Texas (OR  $\geq 2$ ;  $p < 0.05$ ). No single ancestral birthplace characterizes this  
205 cluster, as the US, Mexico, and Cuba each make up more than 10% of the birth origin labels.  
206 Proportions of European ancestry tracts inferred with RFMix<sup>29</sup> are higher in this cluster (mean =  
207 72.7%, sd=20.4%) than in the other Hispanic/Latino clusters (mean = 48.0% - 67.4%). Puerto  
208 Ricans characterize a substantial proportion of another Hispanic/Latino cluster associated with  
209 Florida (OR > 4), as well as New York City (OR > 5). Unlike the other Hispanic clusters, the



210 Puerto Rican cluster shares the same branch on the  $F_{ST}$  tree as the African American clusters,  
211 likely due to high proportions of African ancestry (mean = 11.2%, sd = 9.0%) among Puerto  
212 Ricans.

213  
214 Three distinct clusters of Hispanics were found in the Southwest (**Figure 4**): one strongly  
215 associated with New Mexico (OR > 4;  $p < 0.05$ ), another primarily in Texas (OR > 3;  $p < 0.05$ ),  
216 and the third associated with Southern California (OR > 2;  $p < 0.05$ ). Combined with the EEMS  
217 analysis, these clusters confirm our observation of parallel migration routes from east and west  
218 Mexico into Southwestern United States. While the genetic differentiation of these three clusters  
219 are subtle ( $F_{ST}=0.001-0.003$ ), ancestral birth origin patterns and local ancestry proportions for  
220 these clusters reveal meaningful dissimilarities. Whereas the majority of Hispanics in New  
221 Mexico report US ancestral birth origins through grandparents, the recent ancestors of  
222 Hispanics in Texas are predominantly from Mexico. Nonetheless, these two clusters share  
223 similar local ancestry proportions with only slight genetic dissimilarity that result in a moderate  
224 decrease in migration rate (from darker blue to light blue in **Figure 2B**). The reduced migration  
225 rate along the Texas-Mexico border may be caused by more recent immigrants. Unlike the  
226 Hispanic clusters associated with New Mexico and Texas, the Hispanics in California cluster  
227 contain greater proportions of ancestors from Central and South American (e.g., Colombia and  
228 El Salvador). Proportions of Native American ancestry is also highest in this cluster (**Figure 4**).  
229 Taken together, these two differences further explain the presence of the migration barrier in  
230 Arizona between the Hispanics in the California and the Hispanics in New Mexico.

231  
232 Historical immigration of Europeans into the US occurred in successive waves, with Northern  
233 and Western Europeans making up one wave from the 1840s to 1880s and another wave  
234 comprising of Southern and Eastern Europeans occurring from the 1880s to 1910s.<sup>30</sup> Consistent  
235 with this immigration pattern, haplotype clusters with ancestries from Northwest and Central  
236 Europe have higher proportions of US ancestral birth origins than haplotype clusters from  
237 Southern and Eastern Europe, suggesting earlier immigration (**Figure 5**). The two clusters with  
238 the highest proportion (>75%) of US ancestral birth origin (“Northwest Europe 1” and “Northwest  
239 Europe 2”) have ~4.5% of UK ancestral origins. The Central European cluster and the Irish  
240 cluster both have 66.1% and 68.5% of US ancestral origins, respectively. In contrast, the US  
241 makes up only 62.2% and 34.5% of ancestral birth origin for the clusters of Southern Europeans  
242 and Eastern Europeans, respectively.

243



244 Unlike the larger European clusters, the smaller European clusters reflect the structure of recent  
245 immigrants and genetically isolated populations, recapitulating earlier findings.<sup>8</sup> The geographic  
246 distributions of these subpopulations are more concentrated, and their ancestral birth origin  
247 proportions are overrepresented by specific countries and ethnicities (**Figure 6**). Specifically,  
248 Finns and Scandinavians are abundant in the Upper Midwest and Washington; French  
249 Canadians are found in the Northeast; Acadians are present in the Northeast and Louisiana;  
250 and Italians, Greeks, Ashkenazi Jews, and Admixed Jews are mostly located in the metropolitan  
251 area of New York City. Of the European clusters, median cumulative IBD sharing and cROH  
252 lengths are highest amongst Ashkenazi Jews (31.8cM and 11.3 Mb, respectively; **Table 1**). The  
253 two Jewish-related clusters were identified using self-reported ancestral ethnicity data rather  
254 than birth origin data, since Jewish ancestry is not specific to any single location. Jewish  
255 ancestry, particularly Ashkenazi Jewish ancestry, was more consistently reported on both sides  
256 of the family in the larger Jewish cluster (“Ashkenazi Jewish”), suggesting that individuals are  
257 more admixed in the smaller cluster (“Admixed Jewish”).

258  
259 We inferred two haplotype clusters of African Americans separated along a north-south cline,  
260 recapitulating the EEMS migration barrier inference. One cluster is primarily distributed amongst  
261 the northern and western states (“African Americans North”) while the other is distributed  
262 amongst the states southeast of the Appalachian Mountains (“African Americans South”) (**Figure S7**).  
263 The proportion of US birth origin is higher in the northern cluster than the southern  
264 cluster, further evidence of isolation by distance amongst African Americans in the north.<sup>7</sup> These  
265 two clusters share similar cROH lengths but differ in admixture proportions and median IBD  
266 sharing, pointing to a cluster with consistent African American ancestors and a cluster with more  
267 admixed ancestors. Median IBD sharing is higher amongst African Americans in the south  
268 (median IBD = 19.6 cM, median cROH = 3.3 Mb) than in the north (median = 15.9 cM; **Table 1**)  
269 while the average proportion of African ancestry is higher in the northern cluster than the  
270 southern cluster.

271  
272 Four of the clusters reflect recent immigrants from Asia (**Figure S8**), which grew rapidly in the  
273 mid-20th Century after the elimination of national origin quotas.<sup>31</sup> The recency of immigration  
274 among these clusters is indicated by the less than 30% of ancestral birth origins coming from  
275 the US. Geographically, individuals in these clusters primarily reside in major cities. East Asians  
276 predominantly inhabit the metropolitan areas of the West and Northeast (OR > 2), Southeast  
277 Asians are enriched in the West (OR > 2.5), and South Asians are strongly associated with the

278 Northeast (OR > 2.5). Despite its small size, the cluster of Middle East individuals reflects many  
279 of the known demographic patterns of Arab Americans, as individuals in this cluster are  
280 primarily of Lebanese origin and are distributed in the Northeast as well as metropolitan Detroit.  
281 cROH lengths are particularly long for South Asians (median cROH = 10.3 cM), Southeast  
282 Asians (median cROH = 7.8 cM), and Middle Easterners (median cROH = 8.2 cM), potentially  
283 reflecting inbreeding patterns found in their ancestral regions.<sup>32</sup>

284

## 285 **Discussion**

286

287 As the US population is becoming increasingly diverse, genomic studies are simultaneously  
288 growing in scale and relevance; to increase scientific and ethical parity, these studies must  
289 move beyond the current practice of evaluating genetically homogenous groups in isolation.<sup>15</sup>  
290 Here, we provide an integrative framework for analyzing population structure in ancestrally  
291 heterogeneous individuals. Our comprehensive approach has allowed us to capture spatial  
292 patterns of gene flow within and between subpopulations that are difficult to infer from a single  
293 method alone. For example, EEMS is limited in identifying unique subpopulations, while  
294 haplotype clustering cannot assign partial membership for admixed individuals to multiple  
295 clusters. An integrative approach can thus enable greater insights into populations with complex  
296 histories.

297

298 Consistent with prior studies,<sup>4,9</sup> the recent demographic history of Hispanic/Latino populations is  
299 complex. Large variations in admixture proportions within and between subpopulations are  
300 reflected by US Census data and can likely be explained by numerous inferred migration  
301 barriers. For example, regional differences in the Southwest are highlighted by an inferred  
302 migration barrier in Arizona and distinct haplotype clusters surrounding this region. These  
303 differences are likely due to higher proportions of Native American ancestry as well as more  
304 Central and South American origins in the California Hispanics/Latinos compared to other  
305 southwestern Hispanic/Latinos. Interestingly, although the New Mexican cluster is distinct from  
306 the Texan cluster, high levels of gene flow are inferred from southern New Mexico to central  
307 Texas, suggesting that certain individuals in these two clusters are genetically similar and may  
308 share an ancestral origin (i.e. Mexico). In contrast, those in northern New Mexico are more  
309 genetically differentiated, as indicated by a migration barrier, but share the same cluster; these  
310 are likely *Nuevomexicanos*, descendants of Spanish colonial settlers.

311

312 The fine-scale population structure of African Americans also reflects known historical events  
313 following the transatlantic slave trade, during which millions of West Africans were forcibly  
314 moved to the Americas. Subsequently, the movement of African Americans during the Great  
315 Migration has been shown to correlate with current patterns of relatedness across US census  
316 regions.<sup>7</sup> Our results show barriers to migration and gene flow at fine-scale, particularly along  
317 the Appalachian Mountains. A north-south migration barrier is also present west of the  
318 Mississippi River, and is further supported by the north-south locations of two African American  
319 clusters that emphasize this divide. The southern African American cluster contains more recent  
320 ancestors outside the US, particularly of Caribbean origin, than the northern African American  
321 cluster. These genetic signatures illustrate the impact of recent migration patterns on modern  
322 population structure.

323  
324 Our ability to identify population structure for certain ancestries is subject to participation among  
325 individuals from those groups. In particular, individuals with Asian ancestries account for over  
326 5% of US population, but they are underrepresented in US population genetics studies,  
327 hindering the investigation of their ancestry in prior studies.<sup>8</sup> Our analyses of East Asian,  
328 Southeast Asian, South Asian, and Middle Eastern populations therefore provide initial insights  
329 into their genetic structure. The ancestral origins and geographic distributions of these clusters  
330 are consistent with US Census reports. Since these populations descend from more recent  
331 immigrants, the observed patterns of homozygosity within several of these clusters likely reflect  
332 consanguinity patterns in some of their ancestral regions. Specifically, the long cROH in South  
333 Asians may reflect endogamy for example related to the caste system in India, while similar  
334 patterns among the Middle Eastern and Southeast Asian clusters may be capturing  
335 consanguineous marriage practices in those regions.<sup>33–35</sup> Given the small size of these clusters,  
336 however, further studies of more individuals are needed.

337  
338 Population history in the US is best characterized among the most populous European descent  
339 individuals. Genetic diversity tends to be highest in more densely populated regions, likely due  
340 to the presence of multiple subpopulations in the same place. Many of the European  
341 subpopulations we identified are similar to those previously found—e.g., French Canadians,  
342 Acadians, Scandinavians, and Jews (Supplementary Discussion).<sup>8</sup> The geographic distribution  
343 of these subpopulations, particularly those that are more genetically diverged, overlap in the  
344 metropolitan areas in the Northeast, Midwest, and California.

345

346 The precision of population labels assigned to clusters of individuals is a function of  
347 demographic complexity and sample size. For example, Finnish ancestry is clearly European  
348 but genetically distinct from several other European populations due to historical bottlenecks,  
349 making this ancestry cluster relatively easily separable. By contrast, most Americans of  
350 European descent have heterogeneous ancestors from several northwestern European  
351 countries who have admixed over time. Additionally, while we identify and describe some  
352 substantial structure among Hispanic/Latino populations, considerably more is likely to exist and  
353 remains to be learned from larger and more diverse future studies. Similarly, sub-regional  
354 resolution into the ancestry of recent Asian immigrants to the US has been relatively limited in  
355 population genetics studies, and the structure of this immigration will be learned from larger  
356 future studies. Additional considerations relating to population label precision are the accuracy  
357 of self-reported birth records and variable granularity of geopolitical boundaries.

358  
359 The emergence of biobank-scale genomic data is enabling more complete pedigrees,<sup>36</sup> greater  
360 discoveries of fine-scale population structure, and more precise insights into health-related  
361 associations. An estimated 26 million people have taken a direct-to-consumer ancestry test,<sup>37</sup>  
362 indicating widespread interest in ancestry and heritable factors. As participation in genetic  
363 studies increase, especially in the US with the All of Us Research Program, so does the need  
364 for inferring more granular demographic histories in study cohorts. Understanding such structure  
365 is important to account for stratification, prevent the overgeneralization of results, and avoid  
366 exacerbating existing biases.<sup>14,15</sup> This study demonstrates the potential of coupling genetic data  
367 with geographic and birth origin data to reconstruct such demographic histories, particularly in a  
368 large and heterogeneous population.

369 **Materials and Methods**

370

371 **Human Subjects**

372 The Genographic Project and Geno 2.0 Project received full approval from the Social and  
373 Behavioral Sciences Institutional Review Board (IRB) at the University of Pennsylvania Office of  
374 Regulatory Affairs on April 12, 2005. The IRB operates in compliance with applicable laws,  
375 regulations, and ethical standards necessary for research involving human participants. All data  
376 in this study came from participants that consented to have their results be used in scientific  
377 research. All data was deidentified.

378

379 Participants provided genotype data, geographic location (postal code), ancestral birth origin,  
380 and self-declared ethnicity. We limited our study to those individuals who provided valid  
381 geographic location. Ancestral birth origin and self-declared ethnicity data were collected up to  
382 the grandparents of the participants with ~60% of individuals provided complete pedigrees.

383

384 **Genotyping and Quality Control**

385 Participants of the Genographic project were sequenced with the GenoChip array,<sup>20</sup> an Illumina  
386 iSelect HD custom genotyping bead array with approximately 150,000 Ancestry Informative  
387 Markers. Quality control and phasing of data is described in Supplemental Materials and  
388 Methods. After QC, 32,589 individuals and 108,003 sites remained.

389

390 **Principal Component Analysis**

391 We performed principal component analysis on the quality-controlled samples using FlashPCA  
392 version 2.0.<sup>22</sup> We included the genotypes of all 2,504 individuals from the 1000 Genomes  
393 Project as reference samples. We computed PCs across 108,003 shared sites for 1000  
394 Genome Project individuals and then projected the Genographic individuals on the same  
395 principal component space.

396

397 **Continental Ancestry Assignment**

398 We assigned continental ancestry to each Genographic sample by using a random forest  
399 classifier. Using the PCs and known super population assignment (AFR=African,  
400 EUR=European, EAS=East Asian, AMR=American, and SAS=South Asian) from the 1000  
401 Genome Project samples as training data, we applied the classifier to assign ancestry to each

402 Genographic sample at 90% probability. We considered unassigned ancestries as “other”  
403 (OTH).

404

#### 405 **Genetic Ancestry Proportion Estimation**

406 We estimated admixture proportions using ADMIXTURE by first analyzing the 1000 Genomes  
407 Project in unsupervised mode to learn allele frequencies.<sup>21</sup> Then, we projected the learned allele  
408 frequencies onto the Genographic samples to obtain the admixture proportions. We ran  
409 ADMIXTURE with  $k=2-9$  and chose  $k = 5$  as the most stable representation.

410

#### 411 **UMAP**

412 We applied the Uniform Manifold Approximation and Projection (UMAP) method to visualize  
413 subcontinental structure.<sup>23,24</sup> We first combined the PCs of the Genographic samples and the  
414 1000 Genome Project samples into one dataset. We then applied UMAP on the first 20 PCs  
415 from the joint dataset to produce a two-dimensional plot. We tested various parameter choices  
416 for UMAP and found that the default nearest neighbor value of 15 and the minimum distance  
417 values of 0.5 delivered the clearest result. Coloring of UMAP plots are described in the  
418 Supplemental Materials and Methods.

419

#### 420 **Estimating Effective Migration Surfaces**

421 We estimated migration and diversity relative to geographic distance using the estimating  
422 effective migration surfaces (EEMS) method for Genographic individuals that were classified  
423 under African, European, and Native American ancestries.<sup>25</sup> We excluded East Asian and South  
424 Asian ancestries due to low sample size and density. We used unrelated individuals with  
425 available postal code data. We first computed pairwise genetic dissimilarities with the EEMS  
426 *bed2diffs* tool and then ran EEMS with *runeems\_snps*, setting the number of demes to 500. Per  
427 the recommendation in the manual, we adjusted the variance for all proposed distributions of  
428 diversity, migration, and degree-of-freedom parameters such that all were accepted 10%-40%  
429 of the time. We increased the number of Markov chain Monte Carlo (MCMC) iterations until it  
430 converged.

431

#### 432 **Haplotype Calling and Network Construction**

433 We used IBDSeq version r1206 to generate shared identity-by-descent (IBD) segments from  
434 genotype data for all unrelated individuals.<sup>38</sup> Unlike other IBD detection algorithms, IBDseq does  
435 not rely on phased genotype data and is less susceptible to switch errors in phasing that can

436 cause erroneous haplotype breaks. We filter for IBD segments greater than 3cM. We removed  
437 segments that overlapped with long chromosomal regions (1 Mb) that had no SNPs across all  
438 unrelated individuals. These sites can result in false positives IBD sharing and likely correspond  
439 to centromeres and telomeres. We calculate the cumulative IBD sharing between individuals by  
440 summing the length of all shared IBD segments. We then constructed a haplotype network of  
441 unrelated individuals by defining vertices an individuals and edge weights between vertices as  
442 the cumulative IBD sharing between individuals. We filtered to keep edges with cumulative IBD  
443 sharing is  $\geq 12$  cM and  $\leq 72$  cM, as previously described.<sup>8</sup>

444

#### 445 **Detection of IBD Clusters**

446 To identify clusters of related individuals in the haplotype network, we used the Louvain Method  
447 implemented in the igraph package for R. The Louvain Method is a greedy iterative algorithm  
448 that assigns vertices of a graph into clusters to optimize modularity (a measure of the density of  
449 edges within a community to edges between communities). The Louvain Method begins by first  
450 assigning each node as its own community and then adds node  $i$  to a neighbor community  $j$ . It  
451 then calculates the change in modularity and places  $i$  in the community with that maximizes  
452 modularity. The algorithm repeats this continuously and terminates when no vertices can be  
453 reassigned.

454

455 We partitioned the haplotype network into clusters by recursively applying the Louvain Method  
456 within subcommunities. At the highest level, we take the full, unpartitioned haplotype graph and  
457 identify a set of subcommunities. We isolate the vertices within each subcommunity, keeping  
458 only the edges between those vertices to create separate new networks. We then apply the  
459 Louvain Method to the new subgraphs. We repeat this process up to four levels. We combined  
460 subcommunities with low genetic divergence based on  $F_{ST}$  values of  $< 0.0001$ .

461

#### 462 **Annotation of IBD Clusters**

463 We used a combination of ancestral birth origins and self-reported ethnicities to discern  
464 demographic characteristics of each cluster. For each cluster, we quantified the proportion of  
465 each birth origin (i.e. country of origin) amongst all four grandparents, treating each  
466 grandparent's origin equality. We use these proportions to inform population labels. Clusters in  
467 which a single non-US birth origin was in high proportions was labeled with that country. In  
468 cases where multiple non-US birth locations exists in approximately equally high proportions,  
469 we assigned a label representing the broader region (e.g. Eastern Europeans for Poland,



470 Lithuania, Ukraine, and Slovakia; East Asia for Japan, China). For certain clusters, annotations  
471 could not be easily discerned by birth origin data. In these cases, we relied on self-reported  
472 ethnicities to label the clusters as these populations were found to be less associated with a  
473 non-US country (e.g. Ashkenazi Jews) or the population has resided in the US for generations  
474 (African Americans, Acadians).

475

### 476 **Mapping IBD Clusters**

477 We mapped individuals using their present-day geographic location. We aggregated individuals  
478 from the same county using the postal code to county FIPS code mapping provided by the US  
479 Census. Longitude and latitude points of each county was found using the same data from the  
480 US Census. We identified enriched counties for each cluster by performing a Fisher's exact test  
481 on each county that had  $\geq 30$  individuals to obtain an odds ratio and significance value. We  
482 mapped only counties with statistically significant ( $p < 0.05$ ) enrichment and an odds ratio (OR) of  
483 greater than 1. The size of the circles is scaled to the number of individuals in each location.

484

### 485 **Runs of Homozygosity**

486 We used PLINK v1.90b3.39 to infer runs of homozygosity with a window of 25 SNPs.<sup>39</sup> We  
487 calculated the cumulative runs of homozygosity (cROH) size by summing the lengths of  
488 homozygous segments.

489

### 490 **Local Ancestry Inference**

491 We inferred local ancestry with RFMix v1.5.4 for Genographic samples in clusters that were  
492 annotated as Hispanics/Latinos and African Americans.<sup>29</sup> We used samples of African (LWK,  
493 MSL, GWD, YRI, ESN, ACB, and ASW;  $N = 661$ ), European (CEU, GBR, FIN, IBS, and TSI;  $N$   
494  $= 503$ ), and Native American (MXL, PUR, CLM, and PEL;  $N = 347$ ) ancestry from the 1000  
495 Genomes Project as the reference population. We ran RFMix with the default minimum window  
496 size (0.2 cM) and a node size of 5 with the flags: -w 0.2, -n 5. Global ancestry proportions were  
497 derived by quantifying the proportions of total local ancestry tracts for each ancestry.

498

### 499 **Genetic Divergence**

500 We computed weighted Weir-Cockerham  $F_{ST}$  estimates for each pair of haplotype clusters using  
501 PLINK v1.90b3.39.<sup>39</sup> Using the distance matrix of  $F_{ST}$  values between clusters, we constructed  
502 an unrooted phylogenetic tree using the neighbor joining method implemented in *scikit-bio*.<sup>40</sup> We  
503 visualized the tree using Interactive Tree Of Life.<sup>41</sup>

504 **Data and Code Availability**

505 Genotype data and associated metadata are available to researchers through an application  
506 process and data usage agreement. We encourage qualified researchers to email the  
507 Genographic team at National Geographic Society ([genographic@ngs.org](mailto:genographic@ngs.org)) for information on  
508 and access to the Genographic database.

509

510 Custom scripts generated to analyze the data in this paper are available through GitHub  
511 ([https://github.com/chengdai/genographic\\_ancestry](https://github.com/chengdai/genographic_ancestry)).

512

513 **Acknowledgement**

514 We thank the National Geographic Genographic Project participants who consented to research  
515 participations for making this study possible. We also thank Gregory Vilshansky for helping  
516 organize and manage the data for the Genographic Project.

517

518 This work was supported by funding from the National Institutes of Health (K99MH117229 to  
519 A.R.M.). C.L.D., M.M., R.T., and C.R. would also like to thank all the members of the MIT  
520 Senseable City Lab Consortium for supporting this research. M.G.V. acknowledges support  
521 from the National Geographic Society.

522

523 **Author Contributions**

524 C.L.D. and A.R.M. designed the study, performed research, and wrote the manuscript. R.S.W.  
525 founded and formerly directed the Genographic Project. M.G.V. coordinated and supervised the  
526 Genographic Project. M.M.V., C.H.Y., and R.T. contributed to the data aggregation and data  
527 analysis. A.R.M., C.R. and M.J.D. supervised research. All authors reviewed the manuscript.

528

529 **Conflicts of Interest**

530 M.G.V. is the Senior Program Officer for the National Geographic Society and lead scientist for  
531 the Genographic Project. R.S.W. was the former Director of the Genographic Project and is a  
532 cofounder for Insitome. M.J.D. is a member of the Scientific Advisory Board at Ancestry.com  
533 LLC.

534 **References**

- 535 1. The 1000 Genomes Project Consortium. A global reference for human genetic variation.  
536 *Nature* **526**, 68–74 (2015).
- 537 2. Tishkoff, S. A. *et al.* The Genetic Structure and History of Africans and African Americans.  
538 *Science* **324**, 1035–1044 (2009).
- 539 3. Bryc, K. *et al.* Genome-wide patterns of population structure and admixture in West Africans  
540 and African Americans. *Proc. Natl. Acad. Sci.* **107**, 786–791 (2010).
- 541 4. Bryc, K. *et al.* Genome-wide patterns of population structure and admixture among  
542 Hispanic/Latino populations. *Proc. Natl. Acad. Sci.* **107**, 8954–8961 (2010).
- 543 5. Reich, D. *et al.* Reconstructing Native American population history. *Nature* **488**, 370–374  
544 (2012).
- 545 6. Novembre, J. *et al.* Genes mirror geography within Europe. *Nature* **456**, 98–101 (2008).
- 546 7. Baharian, S. *et al.* The Great Migration and African-American Genomic Diversity. *PLOS*  
547 *Genet.* **12**, e1006059 (2016).
- 548 8. Han, E. *et al.* Clustering of 770,000 genomes reveals post-colonial population structure of  
549 North America. *Nat. Commun.* **8**, 14238 (2017).
- 550 9. Bryc, K., Durand, E. Y., Macpherson, J. M., Reich, D. & Mountain, J. L. The Genetic  
551 Ancestry of African Americans, Latinos, and European Americans across the United States.  
552 *Am. J. Hum. Genet.* **96**, 37–53 (2015).
- 553 10. Wang, S. R. *et al.* Simulation of Finnish Population History, Guided by Empirical Genetic  
554 Data, to Assess Power of Rare-Variant Tests in Finland. *Am. J. Hum. Genet.* **94**, 710–720  
555 (2014).
- 556 11. Bray, S. M. *et al.* Signatures of founder effects, admixture, and selection in the Ashkenazi  
557 Jewish population. *Proc. Natl. Acad. Sci.* **107**, 16222–16227 (2010).
- 558 12. Mooney, J. A. *et al.* Understanding the Hidden Complexity of Latin American Population  
559 Isolates. *Am. J. Hum. Genet.* **103**, 707–726 (2018).
- 560 13. Belbin, G. M. *et al.* Genetic identification of a common collagen disease in Puerto Ricans via  
561 identity-by-descent mapping in a health system. *eLife* **6**, e25060 (2017).
- 562 14. Popejoy, A. B. & Fullerton, S. M. Genomics is failing on diversity. *Nat. News* **538**, 161  
563 (2016).
- 564 15. Martin, A. R. *et al.* Current clinical use of polygenic scores will risk exacerbating health  
565 disparities. *bioRxiv* 441261 (2019). doi:10.1101/441261
- 566 16. Caswell-Jin, J. L. *et al.* Racial/ethnic differences in multiple-gene sequencing results for  
567 hereditary cancer risk. *Genet. Med. Off. J. Am. Coll. Med. Genet.* **20**, 234–239 (2018).

- 568 17. Martin, A. R. *et al.* Human Demographic History Impacts Genetic Risk Prediction across  
569 Diverse Populations. *Am. J. Hum. Genet.* **100**, 635–649 (2017).
- 570 18. Manrai, A. K. *et al.* Genetic Misdiagnoses and the Potential for Health Disparities. *N. Engl.*  
571 *J. Med.* **375**, 655–665 (2016).
- 572 19. Morales, J. *et al.* A standardized framework for representation of ancestry data in genomics  
573 studies, with application to the NHGRI-EBI GWAS Catalog. *Genome Biol.* **19**, (2018).
- 574 20. Elhaik, E. *et al.* The GenoChip: A New Tool for Genetic Anthropology. *Genome Biol. Evol.* **5**,  
575 1021–1031 (2013).
- 576 21. Alexander, D. H., Novembre, J. & Lange, K. Fast model-based estimation of ancestry in  
577 unrelated individuals. *Genome Res.* **19**, 1655–1664 (2009).
- 578 22. Abraham, G., Qiu, Y. & Inouye, M. FlashPCA2: principal component analysis of Biobank-  
579 scale genotype datasets. *Bioinformatics* **33**, 2776–2778 (2017).
- 580 23. McInnes, L. & Healy, J. UMAP: Uniform Manifold Approximation and Projection for  
581 Dimension Reduction. *ArXiv180203426 Cs Stat* (2018).
- 582 24. Diaz-Papkovich, A., Anderson-Trocme, L. & Gravel, S. Revealing multi-scale population  
583 structure in large cohorts. (2018). doi:10.1101/423632
- 584 25. Petkova, D., Novembre, J. & Stephens, M. Visualizing spatial population structure with  
585 estimated effective migration surfaces. *Nat. Genet.* **48**, 94–100 (2016).
- 586 26. US Census Bureau. The Great Migration, 1910 to 1970. *U.S. Census* Available at:  
587 <https://www.census.gov/dataviz/visualizations/020/>. (Accessed: 21st February 2019)
- 588 27. Massey, D. S., Rugh, J. S. & Pren, K. A. The Geography of Undocumented Mexican  
589 Migration. *Mex. Stud. Mex.* **26**, 129–152 (2010).
- 590 28. Blondel, V. D., Guillaume, J.-L., Lambiotte, R. & Lefebvre, E. Fast unfolding of communities  
591 in large networks. *J. Stat. Mech. Theory Exp.* **2008**, P10008 (2008).
- 592 29. Maples, B. K., Gravel, S., Kenny, E. E. & Bustamante, C. D. RFMix: A Discriminative  
593 Modeling Approach for Rapid and Robust Local-Ancestry Inference. *Am. J. Hum. Genet.* **93**,  
594 278–288 (2013).
- 595 30. Passel, J. S. & Fix, M. U.S. Immigration in a Global Context: Past, Present, and Future.  
596 *Indiana J. Glob. Leg. Stud.* **2**, 5–19 (1994).
- 597 31. Grieco, E. M., Trevelyan, E., Larsen, L., Acosta, Y. D. & Gambino, C. The Size, Place of  
598 Birth, and Geographic Distribution of the Foreign-Born Population in the United States: 1960  
599 to 2010. *Popul. Div. Work. Pap. No 96 US Census Bur.* 38
- 600 32. Pemberton, T. J. *et al.* Genomic Patterns of Homozygosity in Worldwide Human  
601 Populations. *Am. J. Hum. Genet.* **91**, 275–292 (2012).

- 602 33. Moorjani, P. *et al.* Genetic Evidence for Recent Population Mixture in India. *Am. J. Hum.*  
603 *Genet.* **93**, 422–438 (2013).
- 604 34. Tadmouri, G. O. *et al.* Consanguinity and reproductive health among Arabs. *Reprod. Health*  
605 **6**, 17 (2009).
- 606 35. Hussain, R. & Bittles, A. H. Assessment of association between consanguinity and fertility in  
607 Asian populations. *J. Health Popul. Nutr.* **22**, 1–12 (2004).
- 608 36. Erlich, Y., Shor, T., Pe'er, I. & Carmi, S. Identity inference of genomic data using long-range  
609 familial searches. *Science* **362**, 690–694 (2018).
- 610 37. Regalado, A. More than 26 million people have taken an at-home ancestry test. *MIT*  
611 *Technology Review* Available at: [https://www.technologyreview.com/s/612880/more-than-](https://www.technologyreview.com/s/612880/more-than-26-million-people-have-taken-an-at-home-ancestry-test/)  
612 [26-million-people-have-taken-an-at-home-ancestry-test/](https://www.technologyreview.com/s/612880/more-than-26-million-people-have-taken-an-at-home-ancestry-test/). (Accessed: 21st February 2019)
- 613 38. Detecting identity by descent and estimating genotype error rates in sequence data. -  
614 PubMed - NCBI. Available at: <https://www.ncbi.nlm.nih.gov/pubmed/24207118>. (Accessed:  
615 21st February 2019)
- 616 39. Purcell, S. *et al.* PLINK: a tool set for whole-genome association and population-based  
617 linkage analyses. *Am. J. Hum. Genet.* **81**, 559–575 (2007).
- 618 40. Saitou, N. & Nei, M. The neighbor-joining method: a new method for reconstructing  
619 phylogenetic trees. *Mol. Biol. Evol.* **4**, 406–425 (1987).
- 620 41. Letunic, I. & Bork, P. Interactive tree of life (iTOL) v3: an online tool for the display and  
621 annotation of phylogenetic and other trees. *Nucleic Acids Res.* **44**, W242-245 (2016).  
622

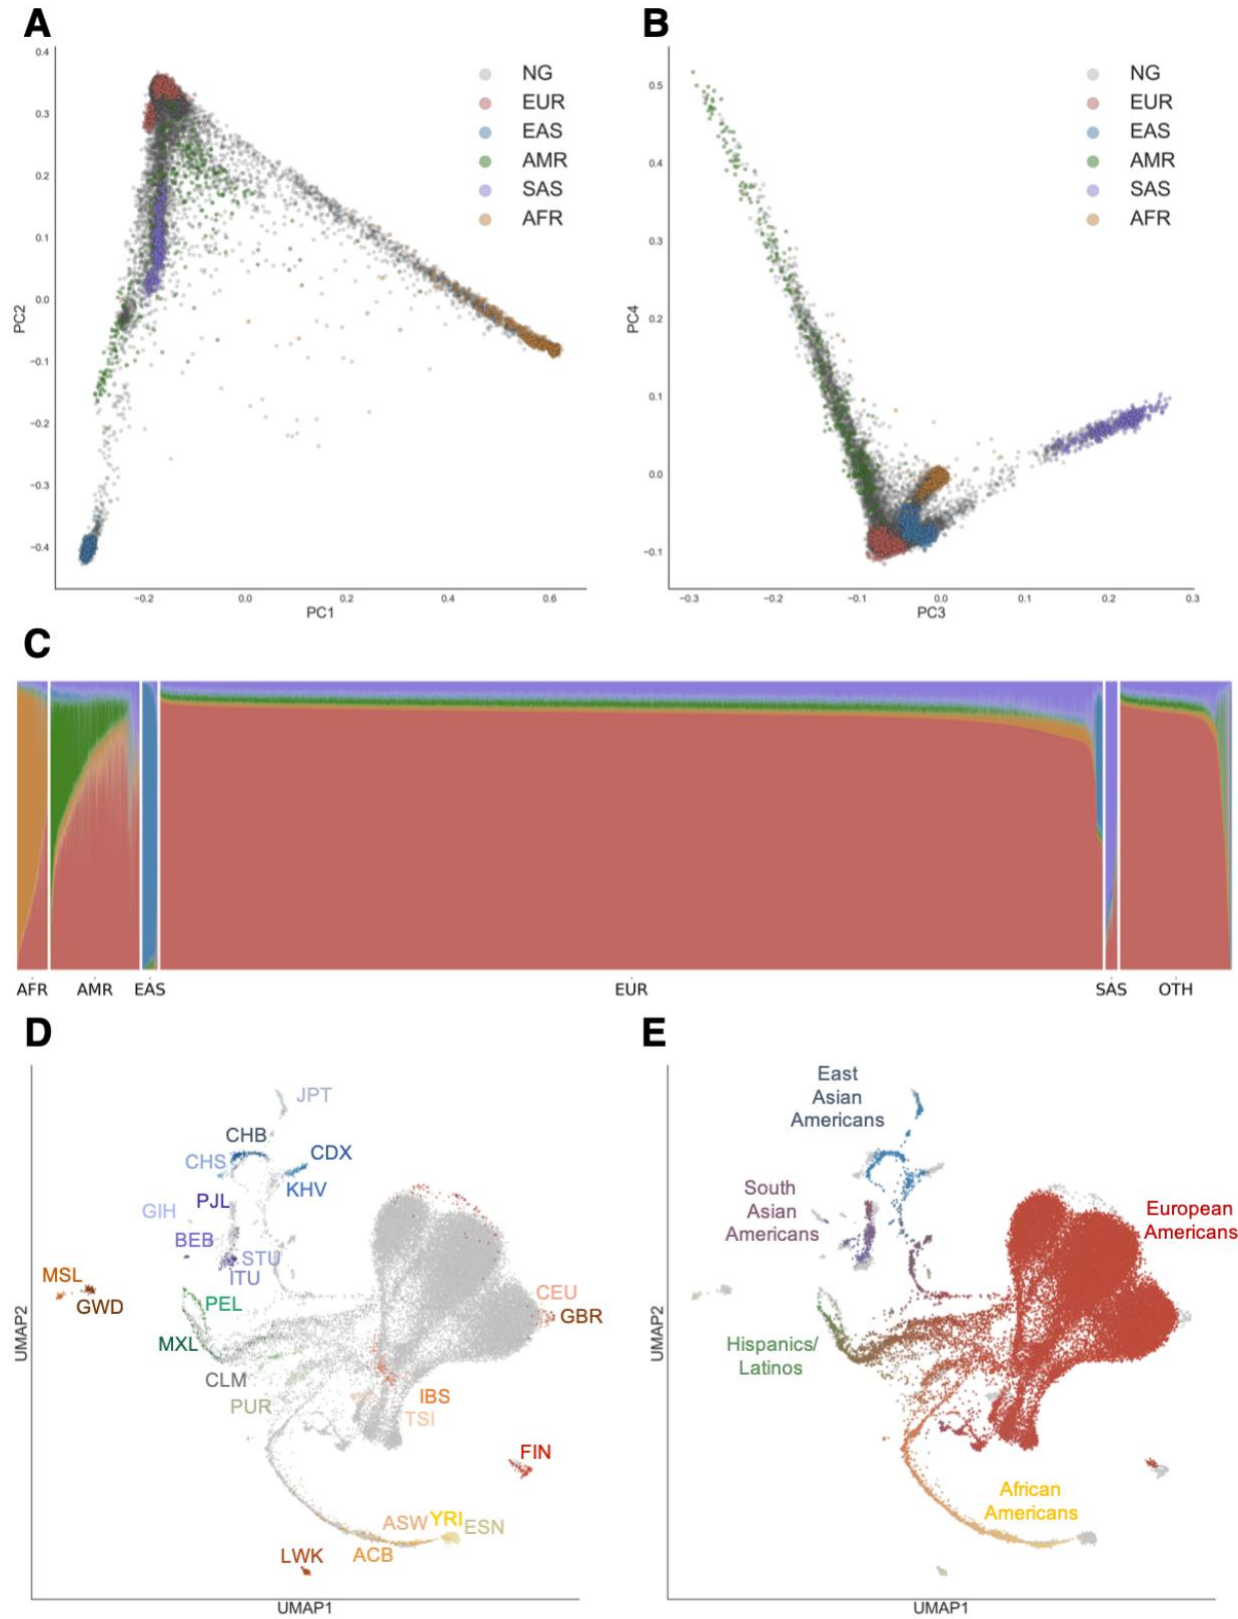

623

624

625 **Figure 1. Genetic Diversity of the US Population**

626 (A) Principal Components Analysis of individuals in the United States and in the 1000 Genome  
627 Project. Each individual is represented by a single dot. Individuals in this study are colored in  
628 grey while 1000 Genome Population individuals are colored by super population (EUR =  
629 European, AFR = African, AMR = Admixed American, EAS = East Asian, SAS = South Asian).  
630 Principal components (PC) 1 and PC2 are shown.

631 (B) Similar to (A), with PC3 and PC4 shown.

632 (C) ADMIXTURE analysis at K=5 of individuals in this study. Each individual was assigned a  
633 continent-level ancestry label using a Random Forest model trained on the super population  
634 labels and the first 10 PCs of the 1000 Genome Project dataset. OTH = individuals who did not  
635 meet the 90% confidence threshold for classification.

636 (D) UMAP projection of the first 20 PCs. Each dot represents one individual. In (D), individuals  
637 in the 1000 Genomes Project are colored by population, while Genographic Project individuals  
638 from this study are in grey. In (E), 1000 Genome Project individuals are colored in grey while  
639 Genographic Project individuals are colored based on their admixture proportions from  
640 ADMIXTURE. The color for each dot was calculated as a linear combination of each individual's  
641 admixture proportion and the RGB values for the colors assigned to each continental ancestry  
642 (EUR = red, AFR = yellow, NAT or Native American = green, EAS = blue, SAS = purple).  
643 Distances in UMAP do not directly correspond to genetic distance. See Materials and Methods  
644 for specific population labels.



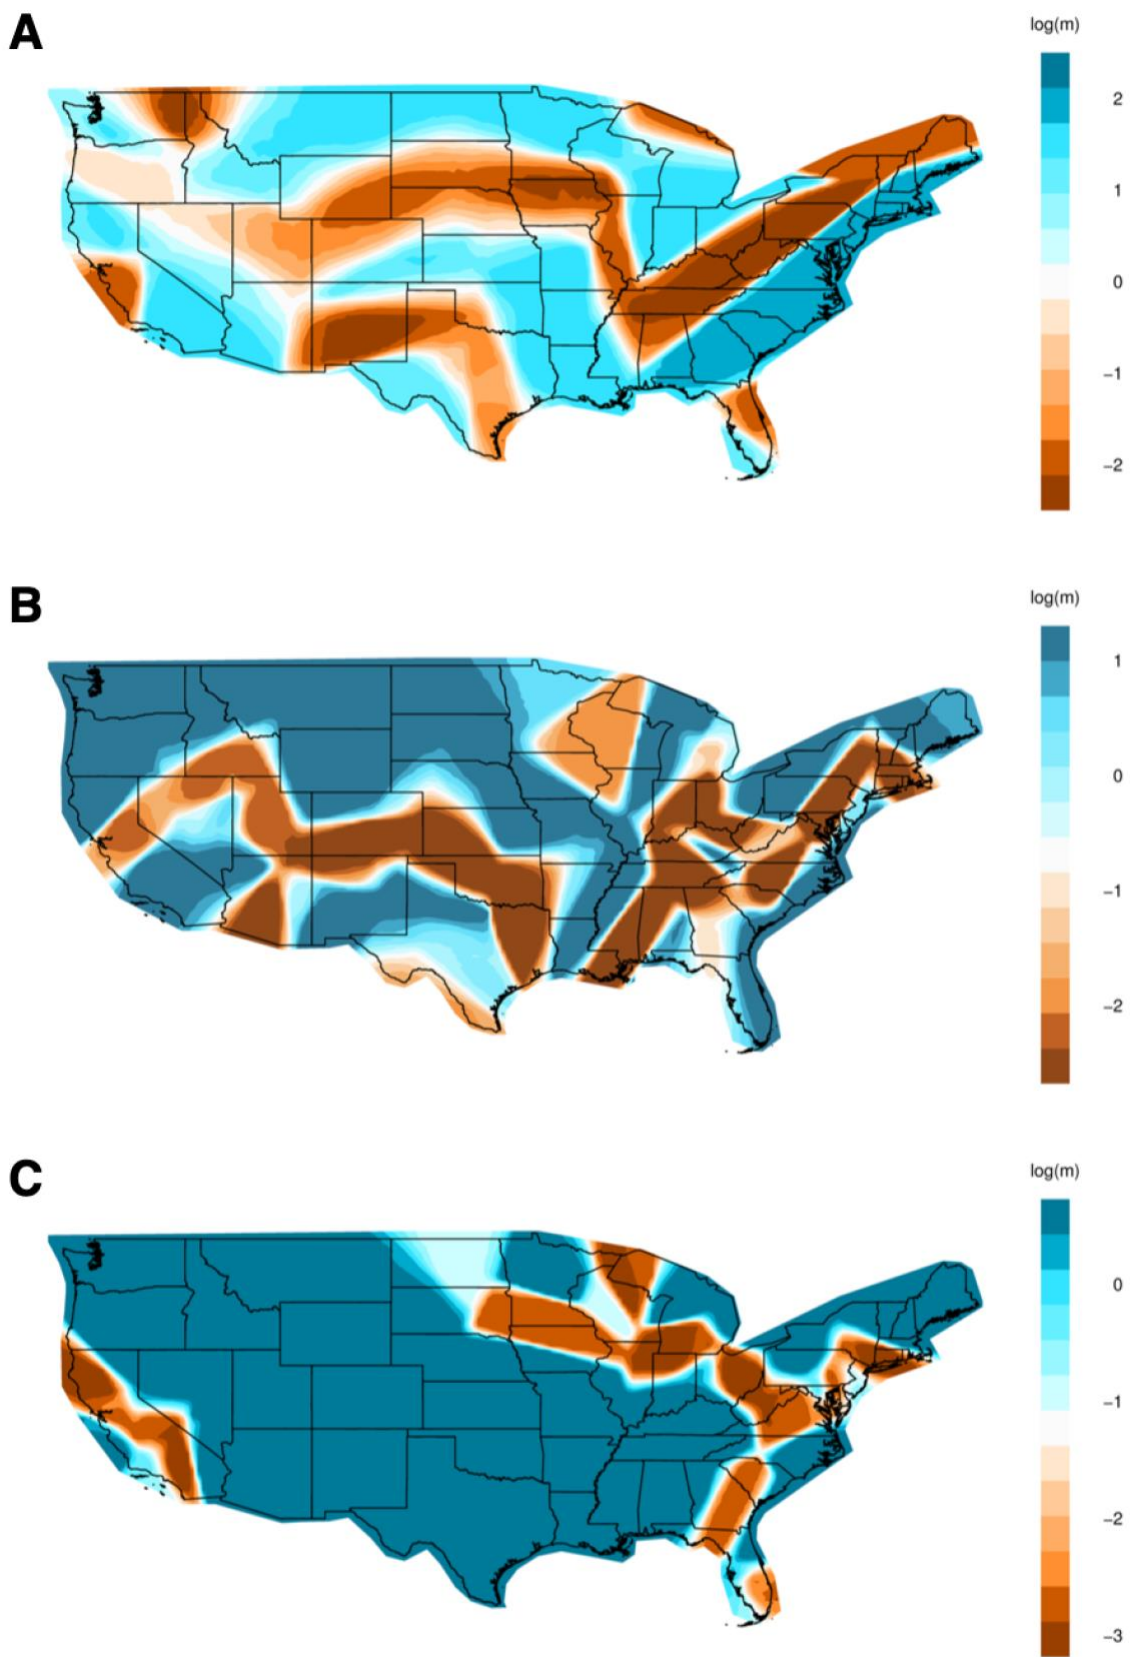

646 **Figure 2. Migration Rates of African Americans, Hispanics/Latinos, and Europeans within**  
647 **the United States.**

648 (A) - (C) Migration rates inferred with EEMS for African Americans (A), Hispanics/Latinos (B),  
649 and Europeans (C). Colors and values correspond to inferred rates,  $m$ , relative to the overall  
650 migration rate across the country. Shades of blue indicate logarithmically higher migration (i.e.  
651  $\log(m) = 1$  represents effective migration that is ten-fold faster than the average) while shades  
652 of orange indicate migration barriers.

653

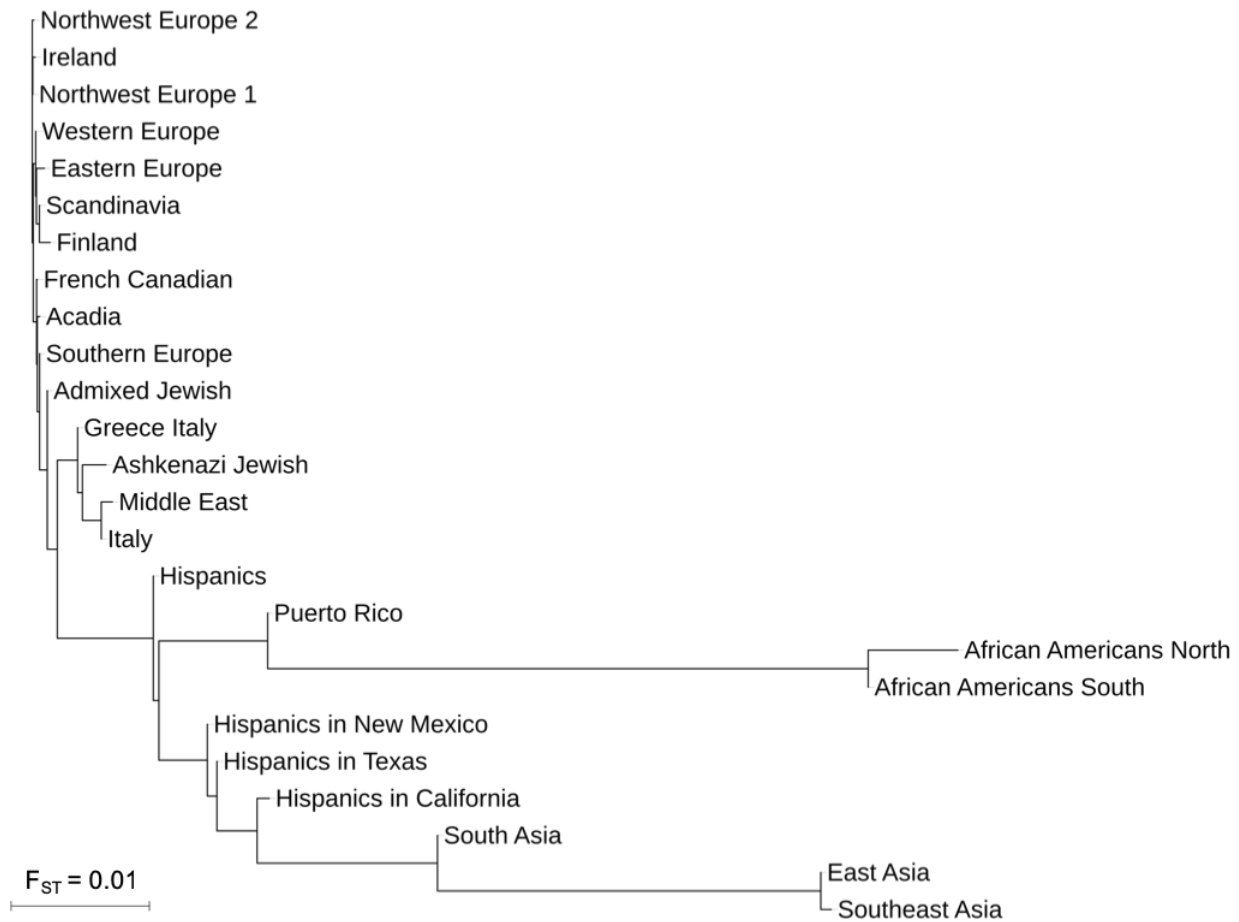

654

655 **Figure 3. Genetic differentiation of haplotype clusters**

656 Unrooted phylogenetic tree of haplotype clusters was constructed using the neighbor joining  
657 method with  $F_{ST}$  as genetic distance. Negative branch lengths were converted to zero.

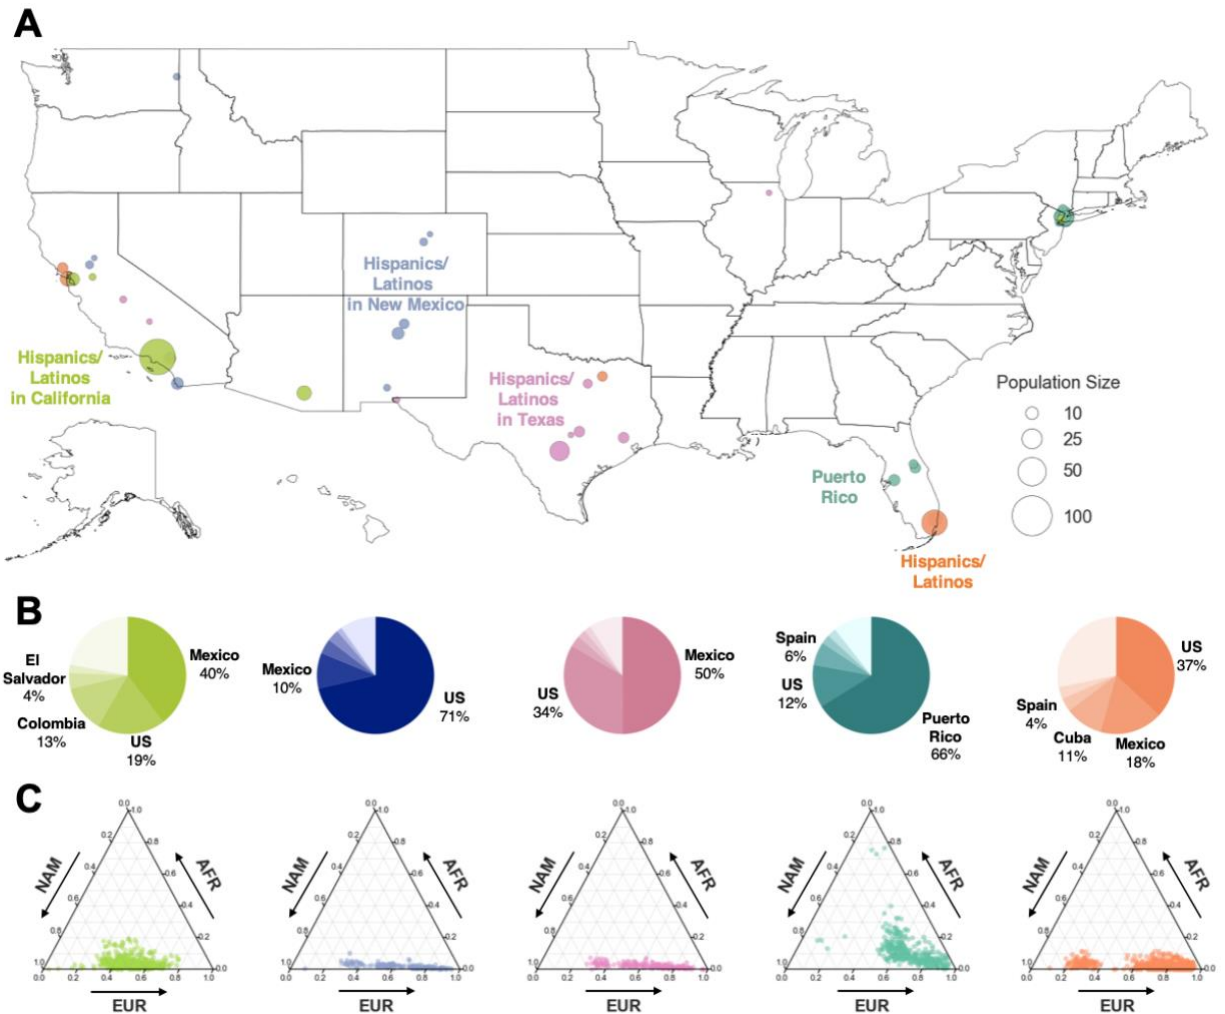

658

659 **Figure 4. Distribution of Hispanic/Latino Haplotype Clusters**

660 (A) Map of counties in which Hispanic/Latino haplotype clusters are enriched. Each dot  
 661 corresponds to a county, and the size of the dot signifies the number of samples of the  
 662 particular cluster in that county. Only the Hispanic/Latino cluster with the highest odds ratio is  
 663 shown for each county, and only the top ten locations with the highest odds ratios are shown for  
 664 each cluster. Maps showing the full distribution for each haplotype cluster can be found in the  
 665 supplement (**Figure S8**).

666 (B) Ancestral birth origin proportions of each cluster for individuals with complete pedigree  
 667 annotations, up to grandparent level. Proportions were calculated from aggregating the birth  
 668 locations of all grandparents corresponding to members of each haplotype cluster. For each  
 669 chart, only the top five birth origins are shown as individual slices; the remaining birth origins are  
 670 aggregated into one slice (lightest color).

671 (C) Ternary plots of ancestry proportions based on local ancestry inference for each haplotype  
672 cluster. Each dot represents one individual.

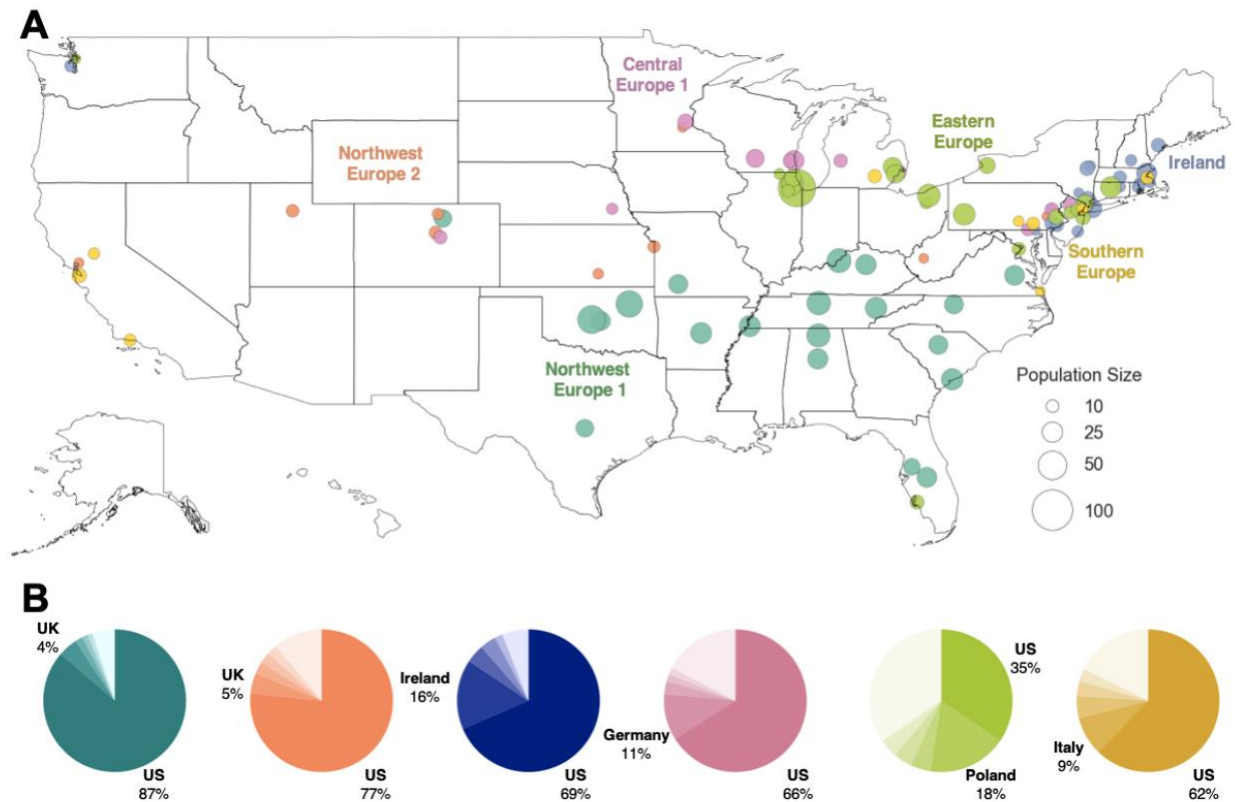

673

### 674 **Figure 5. Distribution of European American Haplotype Clusters**

675 (A) Geographic distributions of haplotype clusters corresponding to regional European  
676 ancestries. Each county containing present-day individuals is represented by a dot. The top 20  
677 locations with the highest odds ratio are shown for each cluster. Maps showing the full  
678 distribution for each cluster can be found in the supplement (**Figure S8**).

679 (B) Ancestral birth origin proportions for each cluster in (A). Only individuals with complete  
680 pedigree annotations, up to grandparent level, are included. For each chart, only the top five  
681 birth origins are visualized as individual slices; the remaining birth origins are aggregated into  
682 one slice (lightest color).

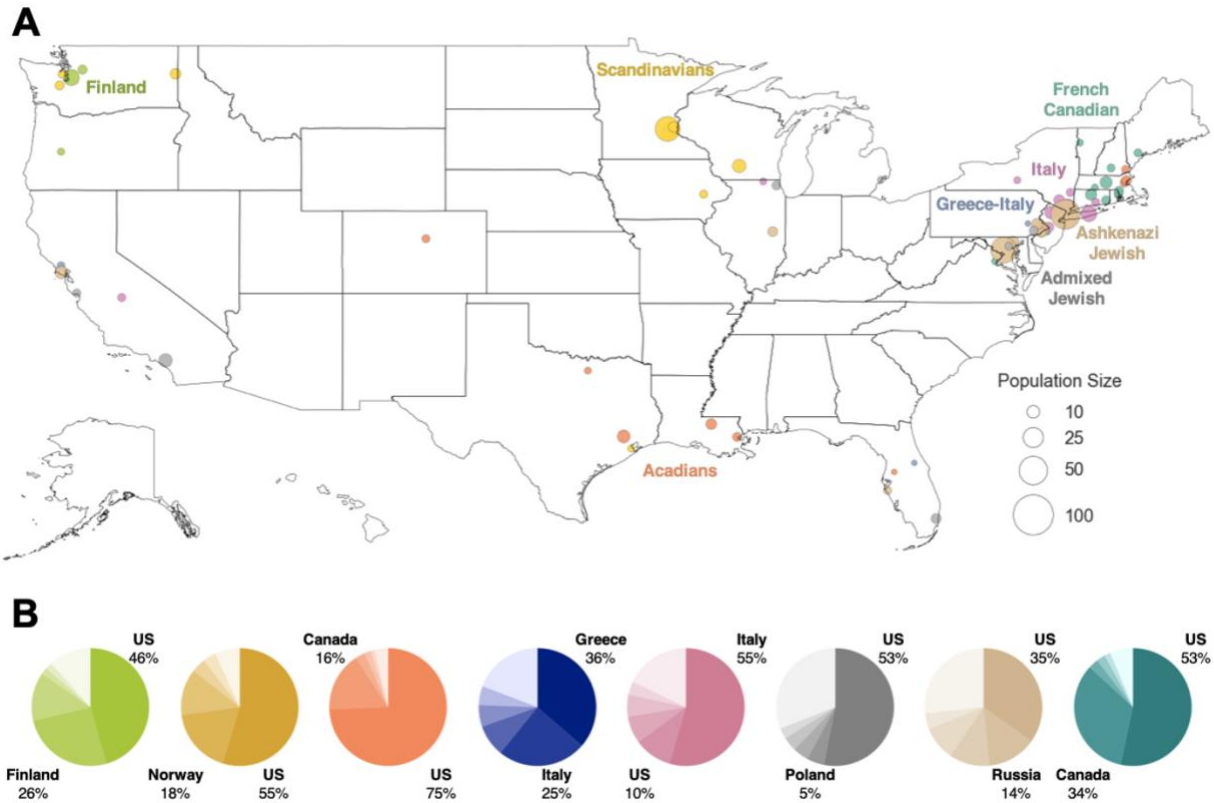

683

684

685 **Figure 6. Distribution of European American Haplotype Clusters**

686 (A) Present-day location of individuals in clusters of more genetically isolated European  
687 populations, similar to Figure 5A. For clarity, the top ten locations with the highest odds ratio are  
688 shown for each cluster.

689 (B) Ancestral birth origin proportions for each cluster in (A). Only individuals with complete  
690 pedigree annotations, up to grandparent level, are shown. For each chart, only the top five birth  
691 origins are shown as individual slices; the remaining birth origins are aggregated into one slice  
692 (lightest color).

693

| <b>Cluster</b>                  | <b>Samples</b> | <b>Median<br/>Cumulative ROH</b> | <b>Median<br/>Cumulative IBD</b> |
|---------------------------------|----------------|----------------------------------|----------------------------------|
| Northwest Europe 1              | 11,725         | 2.88                             | 15.23                            |
| Northwest Europe 2              | 1,571          | 2.80                             | 15.15                            |
| Ireland                         | 2,137          | 2.85                             | 15.42                            |
| Central Europe                  | 3,116          | 2.83                             | 15.06                            |
| Eastern Europe                  | 2,471          | 3.16                             | 15.37                            |
| Southern Europe                 | 1,626          | 2.73                             | 14.98                            |
| Italy                           | 697            | 6.91                             | 14.64                            |
| Greece-Italy                    | 238            | 7.28                             | 15.02                            |
| Scandinavia                     | 717            | 3.02                             | 15.54                            |
| Finland                         | 314            | 3.67                             | 17.50                            |
| Acadia                          | 249            | 3.89                             | 19.48                            |
| French Canadian                 | 314            | 2.89                             | 16.60                            |
| Ashkenazi Jewish                | 1,475          | 11.26                            | 31.75                            |
| Admixed Jewish                  | 445            | 2.75                             | 15.50                            |
| Hispanics/Latinos               | 810            | 3.53                             | 16.38                            |
| Hispanics/Latinos in California | 573            | 4.10                             | 17.11                            |
| Hispanics/Latinos in New Mexico | 163            | 5.52                             | 21.92                            |
| Hispanics/Latinos in Texas      | 177            | 6.27                             | 23.65                            |
| Puerto Rico                     | 350            | 8.01                             | 26.23                            |
| African Americans South         | 761            | 3.34                             | 19.56                            |
| African Americans North         | 420            | 2.94                             | 15.90                            |
| East Asia                       | 561            | 3.65                             | 19.63                            |
| Southeast Asia                  | 325            | 8.44                             | 17.90                            |
| South Asia                      | 389            | 10.42                            | 14.82                            |
| Greater Middle East             | 93             | 9.01                             | 17.16                            |

694

695 **Table 1. Summary of Haplotype Clusters**

696 Cumulative runs of homozygosity (cROH) was calculated by summing the regions of continuous  
697 homozygous segments. Cumulative IBD was determined by summing IBD segments of  $\geq 3$  cM  
698 and filtering for only pairs  $\geq 12$ cM and  $\leq 72$  cM. Statistics were determined within haplotype  
699 clusters, rather than across the ancestrally heterogeneous and imbalanced full network.
